# Supplementary material
Source: PubMed Central journal article supplement (PMC4676079)
Supplement: NIHMS255647-supplement.pdf [file NIHMS255647-supplement.pdf]

*Supporting Information to*

## **Conformational transitions in human AP endonuclease 1 and its active site mutant during abasic site repair**

Lyubov Yu. Kanazhevskaya,<sup>‡</sup> Vladimir V. Koval,<sup>‡,§</sup> Dmitry O. Zharkov,<sup>‡,§</sup> Phyllis R. Strauss<sup>||</sup>  
and Olga S. Fedorova<sup>\*,‡,§</sup>

<sup>‡</sup> *Institute of Chemical Biology & Fundamental Medicine, Siberian Branch of the Russian Academy of Sciences, Novosibirsk 630090, Russia*

<sup>§</sup> *Novosibirsk State University, Novosibirsk 630090, Russia and*

<sup>||</sup> *Department of Biology, Northeastern University, Boston, Massachusetts 02115, USA*

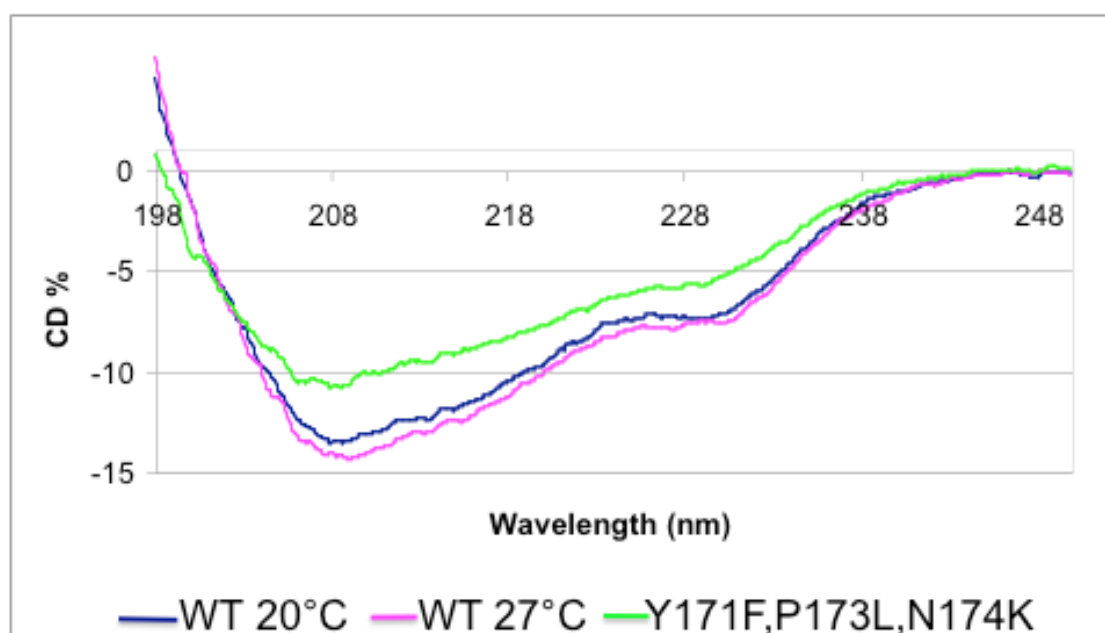

**Figure S1:** Circular dichroism spectra of wild type Apε1 and mutant (Y171F, P173L, N174K) proteins. Circular dichroism was performed on the wild type protein at both 20 °C and at 27 °C and on the mutant protein at 20 °C using a Jasco J-715 Spectropolarimeter with a 1 cm pathlength cuvette. The contribution of the buffer, which was minimal, was subtracted from each spectrum.

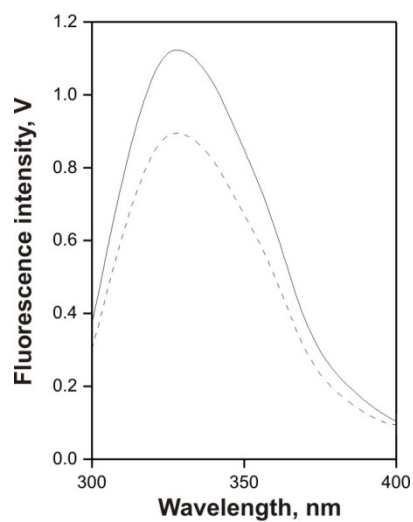

**Figure S2:** The intrinsic fluorescence spectrum of free APE1 (solid line) and APE1-G-ligand complex (dashed line) with excitation at 280 nm ( $[APE1] = [G] = 1.5 \mu M$ ).
